# Supplementary material for: A Study of Older Adults’ Perception of High-Density Housing Neighbourhoods in Singapore: Multi-Sensory Perspective
Source: MDPI journal article supplement (doi:10.3390/ijerph18136880), 2021-06-26
Supplement: s1 [file s1]

**Table S1.** Time lived in the neighbourhood.

|               | Bangkit |       | Clementi |       |
|---------------|---------|-------|----------|-------|
|               | N       | %     | N        | %     |
| under 1 year  | 0       | 0.0   | 2        | 3.1   |
| 1-4 years     | 10      | 4.4   | 5        | 7.8   |
| 5-19 years    | 42      | 18.6  | 46       | 71.9  |
| over 20 years | 174     | 77.0  | 11       | 17.2  |
| Total Valid   | 226     | 100.0 | 64       | 100.0 |
| Missing       | 9       |       | 2        |       |
| Total         | 235     |       | 66       |       |

**Table S2.** Spearman Correlation Test: Correlation between reported health condition and age increment.

|                  |                     | Age     |          |
|------------------|---------------------|---------|----------|
|                  |                     | Bangkit | Clementi |
| Health condition | Corr. Coef. [r]     | -.297** | -.186    |
|                  | Sig. (2-tailed) [p] | 0.000   | 0.139    |
|                  | N                   | 214     | 65       |

\*\* Correlation is significant at the 0.01 level (2-tailed). Weak correlation:  $r=0.20-0.39$ .

**Table S3.** Mann-Whitney U Test for reported health condition between participants with and without any sensory impairment (Bangkit sample).

|                           |                        | N   | Mean Rank | Sum of Ranks |
|---------------------------|------------------------|-----|-----------|--------------|
| Reported Health Condition | No sensory impairment  | 169 | 122.82    | 20756.50     |
|                           | Any sensory impairment | 56  | 83.37     | 4668.50      |
|                           | Total                  | 225 |           |              |

| Test Statistics <sup>a</sup> |           |
|------------------------------|-----------|
| Reported Health Condition    |           |
| Mann-Whitney U [U]           | 3072.500* |
| Wilcoxon W                   | 4668.500  |
| Z                            | -4.203    |
| Asymp. Sig. (2-tailed) [p]   | .000      |

<sup>a</sup> Grouping variable: Any Sensory Impairment; \* Difference is significant at the 0.01 level (2-tailed).

**Table S4.** Spearman Correlation Test: Correlation between reported health condition and frequency of going out.

|                  |                     | Frequency of going out |          |
|------------------|---------------------|------------------------|----------|
|                  |                     | Bangkit                | Clementi |
| Health condition | Corr. Coef. [r]     | -.239**                | .127     |
|                  | Sig. (2-tailed) [p] | 0.000                  | 0.315    |
|                  | N                   | 223                    | 65       |

\* Correlation is significant at the 0.05 level (2-tailed); \*\* Correlation is significant at the 0.01 level (2-tailed); Weak correlation:  $r=0.20-0.39$ .

**Table S5.** Most frequented activities in Bangkit neighbourhood across age groups.

|                                  | 18-49 |       |                         | 50-64 |       |                         | 65-74 |       |                         | 74+ |       |                         |
|----------------------------------|-------|-------|-------------------------|-------|-------|-------------------------|-------|-------|-------------------------|-----|-------|-------------------------|
|                                  | N     | %     | % of Cases <sup>1</sup> | N     | %     | % of Cases <sup>1</sup> | N     | %     | % of Cases <sup>1</sup> | N   | %     | % of Cases <sup>1</sup> |
| Commuting                        | 46    | 20.3  | 70.8                    | 36    | 14.8  | 49.3                    | 17    | 9.7   | 30.4                    | 7   | 7.1   | 24.1                    |
| Strolling                        | 18    | 7.9   | 27.7                    | 23    | 9.4   | 31.5                    | 16    | 9.1   | 28.6                    | 19  | 19.4  | 65.5                    |
| Shopping                         | 41    | 18.1  | 63.1                    | 48    | 19.7  | 65.8                    | 35    | 19.9  | 62.5                    | 18  | 18.4  | 62.1                    |
| Eating                           | 51    | 22.5  | 78.5                    | 41    | 16.8  | 56.2                    | 32    | 18.2  | 57.1                    | 13  | 13.3  | 44.8                    |
| Playing                          | 7     | 3.1   | 10.8                    | 3     | 1.2   | 4.1                     | 3     | 1.7   | 5.4                     | 0   | 0.0   | 0.0                     |
| Exercising                       | 21    | 9.3   | 32.3                    | 29    | 11.9  | 39.7                    | 23    | 13.1  | 41.1                    | 9   | 9.2   | 31.0                    |
| Meeting Friends                  | 27    | 11.9  | 41.5                    | 31    | 12.7  | 42.5                    | 21    | 11.9  | 37.5                    | 17  | 17.3  | 58.6                    |
| Gardening                        | 4     | 1.8   | 6.2                     | 16    | 6.6   | 21.9                    | 12    | 6.8   | 21.4                    | 8   | 8.2   | 27.6                    |
| Visiting Community Organisations | 10    | 4.4   | 15.4                    | 16    | 6.6   | 21.9                    | 16    | 9.1   | 28.6                    | 6   | 6.1   | 20.7                    |
| Other                            | 2     | 0.9   | 3.1                     | 1     | 0.4   | 1.4                     | 1     | 0.6   | 1.8                     | 1   | 1.0   | 3.4                     |
| Total Answers                    | 227   | 100.0 | 349.2                   | 244   | 100.0 | 334.2                   | 176   | 100.0 | 314.3                   | 98  | 100.0 | 337.9                   |
| Total Cases                      | 65    |       |                         | 73    |       |                         | 56    |       |                         | 29  |       |                         |

<sup>1</sup> As this was a multiple answer question, total percentage does not equal to 100%.

**Table S6.** Most frequented activities in Clementi neighbourhood across age groups.

|                                  | 18-49 |       |                         | 50-64 |       |                         | 65-74 |       |                         | 74+ |       |                         |
|----------------------------------|-------|-------|-------------------------|-------|-------|-------------------------|-------|-------|-------------------------|-----|-------|-------------------------|
|                                  | N     | %     | % of Cases <sup>1</sup> | N     | %     | % of Cases <sup>1</sup> | N     | %     | % of Cases <sup>1</sup> | N   | %     | % of Cases <sup>1</sup> |
| Commuting                        | 7     | 20.6  | 58.3                    | 4     | 9.8   | 30.8                    | 6     | 7.9   | 25.0                    | 5   | 9.6   | 29.4                    |
| Strolling                        | 3     | 8.8   | 25.0                    | 6     | 14.6  | 46.2                    | 12    | 15.8  | 50.0                    | 7   | 13.5  | 41.2                    |
| Shopping                         | 7     | 20.6  | 58.3                    | 6     | 14.6  | 46.2                    | 8     | 10.5  | 33.3                    | 7   | 13.5  | 41.2                    |
| Eating                           | 9     | 26.5  | 75.0                    | 9     | 22.0  | 69.2                    | 18    | 23.7  | 75.0                    | 9   | 17.3  | 52.9                    |
| Playing                          | 0     | 0.0   | 0.0                     | 0     | 0.0   | 0.0                     | 0     | 0.0   | 0.0                     | 0   | 0.0   | 0.0                     |
| Exercising                       | 6     | 17.6  | 50.0                    | 5     | 12.2  | 38.5                    | 6     | 7.9   | 25.0                    | 9   | 17.3  | 52.9                    |
| Meeting Friends                  | 1     | 2.9   | 8.3                     | 6     | 14.6  | 46.2                    | 15    | 19.7  | 62.5                    | 9   | 17.3  | 52.9                    |
| Gardening                        | 0     | 0.0   | 0.0                     | 1     | 2.4   | 7.7                     | 0     | 0.0   | 0.0                     | 0   | 0.0   | 0.0                     |
| Visiting Community Organisations | 1     | 2.9   | 8.3                     | 4     | 9.8   | 30.8                    | 11    | 14.5  | 45.8                    | 5   | 9.6   | 29.4                    |
| Other                            | 0     | 0.0   | 0.0                     | 0     | 0.0   | 0.0                     | 0     | 0.0   | 0.0                     | 1   | 1.9   | 5.9                     |
| Total Answers                    | 34    | 100.0 | 283.3                   | 41    | 100.0 | 315.4                   | 76    | 100.0 | 316.7                   | 52  | 100.0 | 305.9                   |
| Total Cases                      | 65    |       |                         | 73    |       |                         | 56    |       |                         | 29  |       |                         |

<sup>1</sup> As this was a multiple answer question, total percentage does not equal to 100%.

**Table S7.** Most frequently visited neighbourhood places (regardless of age).

|                         | Bangkit |       |                         | Clementi |       |                         |
|-------------------------|---------|-------|-------------------------|----------|-------|-------------------------|
|                         | N       | %     | % of Cases <sup>1</sup> | N        | %     | % of Cases <sup>1</sup> |
| Shopping Spaces         | 101     | 29.9  | 51.0                    | 29       | 31.9  | 45.3                    |
| Markets                 | 68      | 20.1  | 34.3                    | 1        | 1.1   | 1.6                     |
| Hawker and Food Centres | 52      | 15.4  | 26.3                    | 35       | 38.5  | 54.7                    |
| Community Organisations | 54      | 16.0  | 27.3                    | 18       | 19.8  | 28.1                    |
| Parks and Gardens       | 42      | 12.4  | 21.2                    | 5        | 5.5   | 7.8                     |
| Fitness Spaces          | 5       | 1.5   | 2.5                     | 0        | 0.0   | 0.0                     |
| Public Spaces           | 8       | 2.4   | 4.0                     | 0        | 0.0   | 0.0                     |
| Others                  | 8       | 2.4   | 4.0                     | 3        | 3.3   | 4.7                     |
| Total Answers           | 338     | 100.0 | 170.7                   | 91       | 100.0 | 142.2                   |
| No Answer               | 26      |       |                         | 2        |       |                         |
| Total Cases             | 198     |       |                         | 64       |       |                         |

<sup>1</sup> As this was a multiple answer question, total percentage does not equal to 100%.

**Table S8.** Most frequently visited places in Bangkit neighbourhood across age groups.

|                         | 18-49 |       |                         | 50-64 |       |                         | 65-74 |       |                         | 74+ |       |                         |
|-------------------------|-------|-------|-------------------------|-------|-------|-------------------------|-------|-------|-------------------------|-----|-------|-------------------------|
|                         | N     | %     | % of Cases <sup>1</sup> | N     | %     | % of Cases <sup>1</sup> | N     | %     | % of Cases <sup>1</sup> | N   | %     | % of Cases <sup>1</sup> |
| Shopping Spaces         | 56    | 49.6  | 87.5                    | 25    | 21.4  | 37.9                    | 16    | 23.9  | 37.2                    | 4   | 9.8   | 16.0                    |
| Markets                 | 15    | 13.3  | 23.4                    | 31    | 26.5  | 47.0                    | 12    | 17.9  | 27.9                    | 10  | 24.4  | 40.0                    |
| Hawker and Food Centres | 15    | 13.3  | 23.4                    | 19    | 16.2  | 28.8                    | 13    | 19.4  | 30.2                    | 5   | 12.2  | 20.0                    |
| Community Organisations | 19    | 16.8  | 29.7                    | 19    | 16.2  | 28.8                    | 8     | 11.9  | 18.6                    | 8   | 19.5  | 32.0                    |
| Parks and Gardens       | 5     | 4.4   | 7.8                     | 16    | 13.7  | 24.2                    | 13    | 19.4  | 30.2                    | 8   | 19.5  | 32.0                    |
| Fitness Spaces          | 0     | 0.0   | 0.0                     | 2     | 1.7   | 3.0                     | 2     | 3.0   | 4.7                     | 1   | 2.4   | 4.0                     |
| Public Spaces           | 0     | 0.0   | 0.0                     | 2     | 1.7   | 3.0                     | 1     | 1.5   | 2.3                     | 5   | 12.2  | 20.0                    |
| Others                  | 3     | 2.7   | 4.7                     | 3     | 2.6   | 4.5                     | 2     | 3.0   | 4.7                     | 0   | 0.0   | 0.0                     |
| Total Answers           | 113   | 100.0 | 176.6                   | 117   | 100.0 | 177.3                   | 67    | 100.0 | 155.8                   | 41  | 100.0 | 164.0                   |
| No Answer               | 1     |       |                         | 7     |       |                         | 13    |       |                         | 5   |       |                         |
| Total Cases             | 64    |       |                         | 66    |       |                         | 43    |       |                         | 25  |       |                         |

<sup>1</sup> As this was a multiple answer question, total percentage does not equal to 100%.

**Table S9.** Most frequently visited places in Clementi neighbourhood across age groups.

|                         | 18-49 |       |                         | 50-64 |       |                         | 65-74 |       |                         | 74+ |       |                         |
|-------------------------|-------|-------|-------------------------|-------|-------|-------------------------|-------|-------|-------------------------|-----|-------|-------------------------|
|                         | N     | %     | % of Cases <sup>1</sup> | N     | %     | % of Cases <sup>1</sup> | N     | %     | % of Cases <sup>1</sup> | N   | %     | % of Cases <sup>1</sup> |
| Shopping Spaces         | 11    | 61.1  | 91.7                    | 6     | 30.0  | 46.2                    | 8     | 25.8  | 34.8                    | 4   | 18.2  | 25.0                    |
| Markets                 | 0     | 0.0   | 0.0                     | 0     | 0.0   | 0.0                     | 0     | 0.0   | 0.0                     | 1   | 4.5   | 6.3                     |
| Hawker and Food Centres | 4     | 22.2  | 33.3                    | 5     | 25.0  | 38.5                    | 16    | 51.6  | 69.6                    | 10  | 45.5  | 62.5                    |
| Community Organisations | 0     | 0.0   | 0.0                     | 6     | 30.0  | 46.2                    | 6     | 19.4  | 26.1                    | 6   | 27.3  | 37.5                    |
| Parks and Gardens       | 1     | 5.6   | 8.3                     | 2     | 10.0  | 15.4                    | 1     | 3.2   | 4.3                     | 1   | 4.5   | 6.3                     |
| Fitness Spaces          | 0     | 0.0   | 0.0                     | 0     | 0.0   | 0.0                     | 0     | 0.0   | 0.0                     | 0   | 0.0   | 0.0                     |
| Public Spaces           | 0     | 0.0   | 0.0                     | 0     | 0.0   | 0.0                     | 0     | 0.0   | 0.0                     | 0   | 0.0   | 0.0                     |
| Others                  | 2     | 11.1  | 16.7                    | 1     | 5.0   | 7.7                     | 0     | 0.0   | 0.0                     | 0   | 0.0   | 0.0                     |
| Total Answers           | 18    | 100.0 | 150.0                   | 20    | 100.0 | 153.8                   | 31    | 100.0 | 134.8                   | 22  | 100.0 | 137.5                   |
| No Answer               | 0     |       |                         | 0     |       |                         | 1     |       |                         | 1   |       |                         |
| Total Cases             | 12    |       |                         | 13    |       |                         | 23    |       |                         | 16  |       |                         |

<sup>1</sup> As this was a multiple answer question, total percentage does not equal to 100%.

**Table S10.** Most liked neighbourhood places (regardless of age).

|                         | Bangkit |       |                         | Clementi |       |                         |
|-------------------------|---------|-------|-------------------------|----------|-------|-------------------------|
|                         | N       | %     | % of Cases <sup>1</sup> | N        | %     | % of Cases <sup>1</sup> |
| Shopping Spaces         | 70      | 25.7  | 42.4                    | 10       | 16.9  | 20.4                    |
| Markets                 | 35      | 12.9  | 21.2                    | 0        | 0.0   | 0.0                     |
| Hawker and Food Centres | 24      | 8.8   | 14.5                    | 17       | 28.8  | 34.7                    |
| Community Organisations | 51      | 18.8  | 30.9                    | 14       | 23.7  | 28.6                    |
| Parks and Gardens       | 67      | 24.6  | 40.6                    | 18       | 30.5  | 36.7                    |
| Fitness Spaces          | 2       | 0.7   | 1.2                     | 0        | 0.0   | 0.0                     |
| Public Spaces           | 9       | 3.3   | 5.5                     | 0        | 0.0   | 0.0                     |
| Others                  | 14      | 5.1   | 8.5                     | 0        | 0.0   | 0.0                     |
| Total Answers           | 272     | 100.0 | 164.8                   | 59       | 100.0 | 120.4                   |
| No Answer               | 59      |       |                         | 17       |       |                         |
| Total Cases             | 165     |       |                         | 49       |       |                         |

<sup>1</sup> As this was a multiple answer question, total percentage does not equal to 100%.

**Table S11.** Most liked places in Bangkit neighbourhood across age groups.

|                         | 18-49 |       |                         | 50-64 |       |                         | 65-74 |       |                         | 74+ |       |                         |
|-------------------------|-------|-------|-------------------------|-------|-------|-------------------------|-------|-------|-------------------------|-----|-------|-------------------------|
|                         | N     | %     | % of Cases <sup>1</sup> | N     | %     | % of Cases <sup>1</sup> | N     | %     | % of Cases <sup>1</sup> | N   | %     | % of Cases <sup>1</sup> |
| Shopping Spaces         | 32    | 33.0  | 56.1                    | 23    | 25.0  | 41.8                    | 12    | 21.8  | 33.3                    | 3   | 10.7  | 17.6                    |
| Markets                 | 7     | 7.2   | 12.3                    | 15    | 16.3  | 27.3                    | 9     | 16.4  | 25.0                    | 4   | 14.3  | 23.5                    |
| Hawker and Food Centres | 7     | 7.2   | 12.3                    | 11    | 12.0  | 20.0                    | 2     | 3.6   | 5.6                     | 4   | 14.3  | 23.5                    |
| Community Organisations | 15    | 15.5  | 26.3                    | 14    | 15.2  | 25.5                    | 16    | 29.1  | 44.4                    | 6   | 21.4  | 35.3                    |
| Parks and Gardens       | 26    | 26.8  | 45.6                    | 24    | 26.1  | 43.6                    | 12    | 21.8  | 33.3                    | 5   | 17.9  | 29.4                    |
| Fitness Spaces          | 0     | 0.0   | 0.0                     | 1     | 1.1   | 1.8                     | 0     | 0.0   | 0.0                     | 1   | 3.6   | 5.9                     |
| Public Spaces           | 1     | 1.0   | 1.8                     | 2     | 2.2   | 3.6                     | 2     | 3.6   | 5.6                     | 4   | 14.3  | 23.5                    |
| Others                  | 9     | 9.3   | 15.8                    | 2     | 2.2   | 3.6                     | 2     | 3.6   | 5.6                     | 1   | 3.6   | 5.9                     |
| Total Answers           | 97    | 100.0 | 170.2                   | 92    | 100.0 | 167.3                   | 55    | 100.0 | 152.8                   | 28  | 100.0 | 164.7                   |
| No Answer               | 8     |       |                         | 18    |       |                         | 20    |       |                         | 13  |       |                         |
| Total Cases             | 57    |       |                         | 55    |       |                         | 36    |       |                         | 17  |       |                         |

<sup>1</sup> As this was a multiple answer question, total percentage does not equal to 100%.

**Table S12.** Most liked places in Clementi neighbourhood across age groups.

|                         | 18-49 |       |                         | 50-64 |       |                         | 65-74 |       |                         | 74+ |       |                         |
|-------------------------|-------|-------|-------------------------|-------|-------|-------------------------|-------|-------|-------------------------|-----|-------|-------------------------|
|                         | N     | %     | % of Cases <sup>1</sup> | N     | %     | % of Cases <sup>1</sup> | N     | %     | % of Cases <sup>1</sup> | N   | %     | % of Cases <sup>1</sup> |
| Shopping Spaces         | 2     | 15.4  | 22.2                    | 3     | 18.8  | 25.0                    | 3     | 16.7  | 17.6                    | 2   | 16.7  | 18.2                    |
| Markets                 | 0     | 0.0   | 0.0                     | 0     | 0.0   | 0.0                     | 0     | 0.0   | 0.0                     | 0   | 0.0   | 0.0                     |
| Hawker and Food Centres | 3     | 23.1  | 33.3                    | 3     | 18.8  | 25.0                    | 5     | 27.8  | 29.4                    | 6   | 50.0  | 54.5                    |
| Community Organisations | 2     | 15.4  | 22.2                    | 4     | 25.0  | 33.3                    | 4     | 22.2  | 23.5                    | 4   | 33.3  | 36.4                    |
| Parks and Gardens       | 6     | 46.2  | 66.7                    | 6     | 37.5  | 50.0                    | 6     | 33.3  | 35.3                    | 0   | 0.0   | 0.0                     |
| Fitness Spaces          | 0     | 0.0   | 0.0                     | 0     | 0.0   | 0.0                     | 0     | 0.0   | 0.0                     | 0   | 0.0   | 0.0                     |
| Public Spaces           | 0     | 0.0   | 0.0                     | 0     | 0.0   | 0.0                     | 0     | 0.0   | 0.0                     | 0   | 0.0   | 0.0                     |
| Others                  | 0     | 0.0   | 0.0                     | 0     | 0.0   | 0.0                     | 0     | 0.0   | 0.0                     | 0   | 0.0   | 0.0                     |
| Total Answers           | 13    | 100.0 | 144.4                   | 16    | 100.0 | 133.3                   | 18    | 100.0 | 105.9                   | 12  | 100.0 | 109.1                   |
| No Answer               | 3     |       |                         | 1     |       |                         | 7     |       |                         | 6   |       |                         |
| Total Cases             | 9     |       |                         | 12    |       |                         | 17    |       |                         | 11  |       |                         |

<sup>1</sup> As this was a multiple answer question, total percentage does not equal to 100%.

**Table S13.** Places to meet friends in the neighbourhood (regardless of age).

|                         | <b>Bangkit</b> |          | <b>Clementi</b> |          |
|-------------------------|----------------|----------|-----------------|----------|
|                         | <b>N</b>       | <b>%</b> | <b>N</b>        | <b>%</b> |
| Shopping Spaces         | 27             | 15.4     | 3               | 5.9      |
| Markets                 | 7              | 4.0      | 1               | 2.0      |
| Hawker and Food Centres | 74             | 42.3     | 31              | 60.8     |
| Community Organisations | 19             | 10.9     | 5               | 9.8      |
| Parks and Gardens       | 13             | 7.4      | 2               | 3.9      |
| Fitness Spaces          | 1              | 0.6      | 0               | 0.0      |
| Public Spaces           | 7              | 4.0      | 0               | 0.0      |
| Others                  | 27             | 15.4     | 9               | 17.6     |
| Total Answers           | 175            | 100.0    | 51              | 100.0    |
| No Answer               | 49             |          | 15              |          |
| Total Cases             | 27             | 15.4     | 3               | 5.9      |

**Table S14.** Places to meet friends in Bangkit neighbourhood across age groups.

|                         | <b>18-49</b> |          | <b>50-64</b> |          | <b>65-74</b> |          | <b>74+</b> |          |
|-------------------------|--------------|----------|--------------|----------|--------------|----------|------------|----------|
|                         | <b>N</b>     | <b>%</b> | <b>N</b>     | <b>%</b> | <b>N</b>     | <b>%</b> | <b>N</b>   | <b>%</b> |
| Shopping Spaces         | 20           | 32.8     | 5            | 8.1      | 1            | 2.9      | 1          | 5.9      |
| Markets                 | 1            | 1.6      | 5            | 8.1      | 1            | 2.9      | 0          | 0.0      |
| Hawker and Food Centres | 25           | 41.0     | 25           | 40.3     | 18           | 51.4     | 6          | 35.3     |
| Community Organisations | 6            | 9.8      | 10           | 16.1     | 2            | 5.7      | 1          | 5.9      |
| Parks and Gardens       | 2            | 3.3      | 9            | 14.5     | 1            | 2.9      | 1          | 5.9      |
| Fitness Spaces          | 0            | 0.0      | 0            | 0.0      | 1            | 2.9      | 0          | 0.0      |
| Public Spaces           | 0            | 0.0      | 1            | 1.6      | 3            | 8.6      | 3          | 17.6     |
| Others                  | 7            | 11.5     | 7            | 11.3     | 8            | 22.9     | 5          | 29.4     |
| Total Answers           | 61           | 100.0    | 62           | 100.0    | 35           | 100.0    | 17         | 100.0    |
| No Answer               | 4            |          | 11           |          | 21           |          | 13         |          |

**Table S15.** Places to meet friends in Clementi neighbourhood across age groups.

|                         | <b>18-49</b> |          | <b>50-64</b> |          | <b>65-74</b> |          | <b>74+</b> |          |
|-------------------------|--------------|----------|--------------|----------|--------------|----------|------------|----------|
|                         | <b>N</b>     | <b>%</b> | <b>N</b>     | <b>%</b> | <b>N</b>     | <b>%</b> | <b>N</b>   | <b>%</b> |
| Shopping Spaces         | 2            | 20.0     | 1            | 9.1      | 0            | 0.0      | 0          | 0.0      |
| Markets                 | 1            | 10.0     | 0            | 0.0      | 0            | 0.0      | 0          | 0.0      |
| Hawker and Food Centres | 3            | 30.0     | 6            | 54.5     | 15           | 78.9     | 7          | 63.6     |
| Community Organisations | 0            | 0.0      | 1            | 9.1      | 1            | 5.3      | 3          | 27.3     |
| Parks and Gardens       | 1            | 10.0     | 1            | 9.1      | 0            | 0.0      | 0          | 0.0      |
| Fitness Spaces          | 0            | 0.0      | 0            | 0.0      | 0            | 0.0      | 0          | 0.0      |
| Public Spaces           | 0            | 0.0      | 0            | 0.0      | 0            | 0.0      | 0          | 0.0      |
| Others                  | 3            | 30.0     | 2            | 18.2     | 3            | 15.8     | 1          | 9.1      |
| Total Answers           | 10           | 100.0    | 11           | 100.0    | 19           | 100.0    | 11         | 100.0    |
| No Answer               | 2            |          | 2            |          | 5            |          | 6          |          |

**Table S16.** Most disliked neighbourhood places (regardless of age).

|                         | Bangkit |       |                         | Clementi |       |                         |
|-------------------------|---------|-------|-------------------------|----------|-------|-------------------------|
|                         | N       | %     | % of Cases <sup>1</sup> | N        | %     | % of Cases <sup>1</sup> |
| Shopping Spaces         | 4       | 4.8   | 5.9                     | 1        | 3.8   | 4.5                     |
| Markets                 | 6       | 7.1   | 8.8                     | 0        | 0.0   | 0.0                     |
| Hawker and Food Centres | 7       | 8.3   | 10.3                    | 6        | 23.1  | 27.3                    |
| Community Organisations | 2       | 2.4   | 2.9                     | 1        | 3.8   | 4.5                     |
| Parks and Gardens       | 1       | 1.2   | 1.5                     | 2        | 7.7   | 9.1                     |
| Fitness Spaces          | 2       | 2.4   | 2.9                     | 0        | 0.0   | 0.0                     |
| Public Spaces           | 5       | 6.0   | 7.4                     | 0        | 0.0   | 0.0                     |
| Others <sup>2</sup>     | 57      | 67.9  | 83.8                    | 16       | 61.5  | 72.7                    |
| Total Answers           | 84      | 100.0 | 123.5                   | 26       | 100.0 | 118.2                   |
| No Answer               | 156     |       |                         | 44       |       |                         |
| Total Cases             | 68      |       |                         | 22       |       |                         |

<sup>1</sup> As this was a multiple answer question, total percentage does not equal to 100%.

<sup>2</sup> These spaces typically refer to messy or dark areas close to rubbish collection points.

**Table S17.** Most disliked neighbourhood places in Bangkit neighbourhood across age groups.

|                         | 18-49 |       |                         | 50-64 |       |                         | 65-74 |       |                         | 74+ |       |                         |
|-------------------------|-------|-------|-------------------------|-------|-------|-------------------------|-------|-------|-------------------------|-----|-------|-------------------------|
|                         | N     | %     | % of Cases <sup>1</sup> | N     | %     | % of Cases <sup>1</sup> | N     | %     | % of Cases <sup>1</sup> | N   | %     | % of Cases <sup>1</sup> |
| Shopping Spaces         | 2     | 6.5   | 8.0                     | 1     | 3.2   | 4.0                     | 0     | 0.0   | 0.0                     | 1   | 25.0  | 33.3                    |
| Markets                 | 1     | 3.2   | 4.0                     | 0     | 0.0   | 0.0                     | 5     | 27.8  | 33.3                    | 0   | 0.0   | 0.0                     |
| Hawker and Food Centres | 2     | 6.5   | 8.0                     | 2     | 6.5   | 8.0                     | 2     | 11.1  | 13.3                    | 1   | 25.0  | 33.3                    |
| Community Organisations | 2     | 6.5   | 8.0                     | 0     | 0.0   | 0.0                     | 0     | 0.0   | 0.0                     | 0   | 0.0   | 0.0                     |
| Parks and Gardens       | 1     | 3.2   | 4.0                     | 0     | 0.0   | 0.0                     | 0     | 0.0   | 0.0                     | 0   | 0.0   | 0.0                     |
| Fitness Spaces          | 0     | 0.0   | 0.0                     | 0     | 0.0   | 0.0                     | 1     | 5.6   | 6.7                     | 1   | 25.0  | 33.3                    |
| Public Spaces           | 1     | 3.2   | 4.0                     | 1     | 3.2   | 4.0                     | 3     | 16.7  | 20.0                    | 0   | 0.0   | 0.0                     |
| Others <sup>2</sup>     | 22    | 71.0  | 88.0                    | 27    | 87.1  | 108.0                   | 7     | 38.9  | 46.7                    | 1   | 25.0  | 33.3                    |
| Total Answers           | 31    | 100.0 | 124.0                   | 31    | 100.0 | 124.0                   | 18    | 100.0 | 120.0                   | 4   | 100.0 | 133.3                   |
| No Answer               | 40    |       |                         | 48    |       |                         | 41    |       |                         | 27  |       |                         |
| Total Cases             | 25    |       |                         | 25    |       |                         | 15    |       |                         | 3   |       |                         |

<sup>1</sup> As this was a multiple answer question, total percentage does not equal to 100%.

<sup>2</sup> These spaces typically refer to messy or dark areas close to rubbish collection points.

**Table S18.** Most disliked neighbourhood places in Clementi neighbourhood across age groups.

|                         | 18-49 |       |                         | 50-64 |       |                         | 65-74 |       |                         | 74+ |       |                         |
|-------------------------|-------|-------|-------------------------|-------|-------|-------------------------|-------|-------|-------------------------|-----|-------|-------------------------|
|                         | N     | %     | % of Cases <sup>1</sup> | N     | %     | % of Cases <sup>1</sup> | N     | %     | % of Cases <sup>1</sup> | N   | %     | % of Cases <sup>1</sup> |
| Shopping Spaces         | 1     | 12.5  | 14.3                    | 0     | 0.0   | 0.0                     | 0     | 0.0   | 0.0                     | 0   | 0.0   | 0.0                     |
| Markets                 | 0     | 0.0   | 0.0                     | 0     | 0.0   | 0.0                     | 0     | 0.0   | 0.0                     | 0   | 0.0   | 0.0                     |
| Hawker and Food Centres | 2     | 25.0  | 28.6                    | 3     | 33.3  | 42.9                    | 1     | 14.3  | 16.7                    | 0   | 0.0   | 0.0                     |
| Community Organisations | 0     | 0.0   | 0.0                     | 0     | 0.0   | 0.0                     | 0     | 0.0   | 0.0                     | 1   | 50.0  | 50.0                    |
| Parks and Gardens       | 0     | 0.0   | 0.0                     | 1     | 11.1  | 14.3                    | 1     | 14.3  | 16.7                    | 0   | 0.0   | 0.0                     |
| Fitness Spaces          | 0     | 0.0   | 0.0                     | 0     | 0.0   | 0.0                     | 0     | 0.0   | 0.0                     | 0   | 0.0   | 0.0                     |
| Public Spaces           | 0     | 0.0   | 0.0                     | 0     | 0.0   | 0.0                     | 0     | 0.0   | 0.0                     | 0   | 0.0   | 0.0                     |
| Others <sup>2</sup>     | 5     | 62.5  | 71.4                    | 5     | 55.6  | 71.4                    | 5     | 71.4  | 83.3                    | 1   | 50.0  | 50.0                    |
| Total Answers           | 8     | 100.0 | 114.3                   | 9     | 100.0 | 128.6                   | 7     | 100.0 | 116.7                   | 2   | 100.0 | 100.0                   |
| No Answer               | 5     |       |                         | 6     |       |                         | 18    |       |                         | 15  |       |                         |
| Total Cases             | 7     |       |                         | 7     |       |                         | 6     |       |                         | 2   |       |                         |

<sup>1</sup> As this was a multiple answer question, total percentage does not equal to 100%.

<sup>2</sup> These spaces typically refer to messy or dark areas close to rubbish collection points.

**Table S19.** Overall sensory appreciation assessment in Bangkit neighbourhood (Question 10 of Socio-sensory Survey, Appendix A).

|                               | Strongly Disagree |       | Somewhat Disagree |       | Neither Agree nor Disagree |       | Somewhat Agree |       | Strongly Agree |       | Total |     |
|-------------------------------|-------------------|-------|-------------------|-------|----------------------------|-------|----------------|-------|----------------|-------|-------|-----|
|                               | N                 | %     | N                 | %     | N                          | %     | N              | %     | N              | %     | N     | %   |
| Q10a Aesthetically appealing  | 2                 | 0.93  | 7                 | 3.24  | 36                         | 16.67 | 143            | 66.20 | 28             | 12.96 | 216   | 100 |
| Q10b Distinguishable ambients | 1                 | 0.46  | 9                 | 4.15  | 53                         | 24.42 | 132            | 60.83 | 22             | 10.14 | 217   | 100 |
| Q10c Different cultures       | 5                 | 2.39  | 14                | 6.70  | 57                         | 27.27 | 111            | 53.11 | 22             | 10.53 | 209   | 100 |
| Q10d Too crowded              | 6                 | 2.78  | 52                | 24.07 | 76                         | 35.19 | 68             | 31.48 | 14             | 6.48  | 216   | 100 |
| Q10e Clean & tidy             | 4                 | 1.84  | 15                | 6.91  | 27                         | 12.44 | 133            | 61.29 | 38             | 17.51 | 217   | 100 |
| Q10f Smelly                   | 31                | 13.14 | 94                | 39.83 | 62                         | 26.27 | 24             | 10.17 | 25             | 10.59 | 235   | 100 |
| Q10g Noisy                    | 31                | 14.29 | 77                | 35.48 | 56                         | 25.81 | 45             | 20.74 | 8              | 3.69  | 217   | 100 |
| Q10h Overwhelming             | 29                | 13.74 | 78                | 36.97 | 66                         | 31.28 | 35             | 16.59 | 3              | 1.42  | 211   | 100 |

**Table S20.** Overall sensory appreciation assessment in Clementi neighbourhood (Question 10 of Socio-sensory Survey, Appendix A).

|                               | Strongly Disagree |       | Somewhat Disagree |       | Neither Agree nor Disagree |       | Somewhat Agree |       | Strongly Agree |       | Total |     |
|-------------------------------|-------------------|-------|-------------------|-------|----------------------------|-------|----------------|-------|----------------|-------|-------|-----|
|                               | N                 | %     | N                 | %     | N                          | %     | N              | %     | N              | %     | N     | %   |
| Q10a Aesthetically appealing  | 1                 | 1.52  | 2                 | 3.03  | 10                         | 15.15 | 44             | 66.67 | 9              | 13.64 | 66    | 100 |
| Q10b Distinguishable ambients | 4                 | 6.15  | 4                 | 6.15  | 18                         | 27.69 | 32             | 49.23 | 7              | 10.77 | 65    | 100 |
| Q10c Different cultures       | 3                 | 4.55  | 7                 | 10.61 | 15                         | 22.73 | 35             | 53.03 | 6              | 9.09  | 66    | 100 |
| Q10d Too crowded              | 3                 | 4.55  | 34                | 51.52 | 11                         | 16.67 | 12             | 18.18 | 6              | 9.09  | 66    | 100 |
| Q10e Clean & tidy             | 2                 | 3.08  | 15                | 23.08 | 9                          | 13.85 | 32             | 49.23 | 7              | 10.77 | 65    | 100 |
| Q10f Smelly                   | 9                 | 13.85 | 27                | 41.54 | 13                         | 20.00 | 13             | 20.00 | 3              | 4.62  | 65    | 100 |
| Q10g Noisy                    | 8                 | 12.12 | 34                | 51.52 | 12                         | 18.18 | 7              | 10.61 | 5              | 7.58  | 66    | 100 |
| Q10h Overwhelming             | 5                 | 7.69  | 33                | 50.77 | 13                         | 20.00 | 9              | 13.85 | 5              | 7.69  | 65    | 100 |

**Table S21.** Overall walking experience assessment in Bangkit neighbourhood (Question 11 of Socio-sensory Survey, Appendix A).

|                                | Strongly Disagree |       | Somewhat Disagree |       | Neither Agree nor Disagree |       | Somewhat Agree |       | Strongly Agree |       | Total |     |
|--------------------------------|-------------------|-------|-------------------|-------|----------------------------|-------|----------------|-------|----------------|-------|-------|-----|
|                                | N                 | %     | N                 | %     | N                          | %     | N              | %     | N              | %     | N     | %   |
| Q11a Obstacles to walk         | 13                | 6.40  | 81                | 39.90 | 47                         | 23.15 | 56             | 27.59 | 6              | 2.96  | 203   | 100 |
| Q11b Slippery floors           | 16                | 7.73  | 76                | 36.71 | 44                         | 21.26 | 63             | 30.43 | 8              | 3.86  | 207   | 100 |
| Q11c Hesitate to go out        | 48                | 23.65 | 98                | 48.28 | 31                         | 15.27 | 22             | 10.84 | 4              | 1.97  | 203   | 100 |
| Q11d Cannot find my way        | 60                | 29.13 | 95                | 46.12 | 29                         | 14.08 | 19             | 9.22  | 3              | 1.46  | 206   | 100 |
| Q11e Nature                    | 1                 | 0.48  | 6                 | 2.90  | 24                         | 11.59 | 124            | 59.90 | 52             | 25.12 | 207   | 100 |
| Q11f Avoid messy & dark places | 7                 | 3.40  | 60                | 29.13 | 38                         | 18.45 | 66             | 32.04 | 35             | 16.99 | 206   | 100 |
| Q11g Prefer sheltered pathways | 10                | 2.45  | 23                | 5.64  | 98                         | 24.02 | 73             | 17.89 | 204            | 50.00 | 408   | 100 |

**Table S22.** Overall walking experience assessment in Clementi neighbourhood (Question 11 of Socio-sensory Survey, Appendix A).

|                                | Strongly Disagree |       | Somewhat Disagree |       | Neither Agree nor Disagree |       | Somewhat Agree |       | Strongly Agree |       | Total |     |
|--------------------------------|-------------------|-------|-------------------|-------|----------------------------|-------|----------------|-------|----------------|-------|-------|-----|
|                                | N                 | %     | N                 | %     | N                          | %     | N              | %     | N              | %     | N     | %   |
| Q11a Obstacles to walk         | 9                 | 13.64 | 31                | 46.97 | 9                          | 13.64 | 9              | 13.64 | 8              | 12.12 | 66    | 100 |
| Q11b Slippery floors           | 2                 | 3.03  | 24                | 36.36 | 6                          | 9.09  | 26             | 39.39 | 8              | 12.12 | 66    | 100 |
| Q11c Hesitate to go out        | 14                | 21.54 | 32                | 49.23 | 9                          | 13.85 | 6              | 9.23  | 4              | 6.15  | 65    | 100 |
| Q11d Cannot find my way        | 13                | 19.70 | 33                | 50.00 | 10                         | 15.15 | 5              | 7.58  | 5              | 7.58  | 66    | 100 |
| Q11e Nature                    | 3                 | 4.55  | 4                 | 6.06  | 5                          | 7.58  | 36             | 54.55 | 18             | 27.27 | 66    | 100 |
| Q11f Avoid messy & dark places | 4                 | 6.15  | 13                | 20.00 | 14                         | 21.54 | 28             | 43.08 | 6              | 9.23  | 65    | 100 |
| Q11g Prefer sheltered pathways | 2                 | 3.03  | 3                 | 4.55  | 16                         | 24.24 | 35             | 53.03 | 10             | 15.15 | 66    | 100 |

**Table S23.** Overall satisfaction with Bangkit neighbourhood (Question 12 of Socio-sensory Survey, Appendix A).

|                            | Strongly Disagree |      | Somewhat Disagree |      | Neither Agree nor Disagree |       | Somewhat Agree |       | Strongly Agree |       | Total |     |
|----------------------------|-------------------|------|-------------------|------|----------------------------|-------|----------------|-------|----------------|-------|-------|-----|
|                            | N                 | %    | N                 | %    | N                          | %     | N              | %     | N              | %     | N     | %   |
| Q12a Amenities             | 0                 | 0.00 | 5                 | 2.46 | 25                         | 12.32 | 132            | 65.02 | 41             | 20.20 | 203   | 100 |
| Q12b Different Generations | 4                 | 2.00 | 13                | 6.50 | 37                         | 18.50 | 118            | 59.00 | 28             | 14.00 | 200   | 100 |
| Q12c Elderly-friendly      | 3                 | 1.50 | 9                 | 4.50 | 34                         | 17.00 | 125            | 62.50 | 29             | 14.50 | 200   | 100 |
| Q12d Happy                 | 1                 | 0.33 | 2                 | 0.66 | 18                         | 5.94  | 79             | 26.07 | 203            | 67.00 | 303   | 100 |

**Table S24.** Overall satisfaction with Clementi neighbourhood (Question 12 of Socio-sensory Survey, Appendix A).

|                            | Strongly Disagree |      | Somewhat Disagree |       | Neither Agree nor Disagree |      | Somewhat Agree |       | Strongly Agree |       | Total |     |
|----------------------------|-------------------|------|-------------------|-------|----------------------------|------|----------------|-------|----------------|-------|-------|-----|
|                            | N                 | %    | N                 | %     | N                          | %    | N              | %     | N              | %     | N     | %   |
| Q12a Amenities             | 0                 | 0.00 | 2                 | 3.13  | 3                          | 4.69 | 48             | 75.00 | 11             | 17.19 | 64    | 100 |
| Q12b Different Generations | 0                 | 0.00 | 7                 | 10.94 | 6                          | 9.38 | 43             | 67.19 | 8              | 12.50 | 64    | 100 |
| Q12c Elderly-friendly      | 3                 | 4.55 | 7                 | 10.61 | 3                          | 4.55 | 41             | 62.12 | 12             | 18.18 | 66    | 100 |
| Q12d Happy                 | 0                 | 0.00 | 2                 | 3.03  | 4                          | 6.06 | 36             | 54.55 | 24             | 36.36 | 66    | 100 |



Table S25. Spearman Correlations between different aspects of socio-perceptual assessment (Bangkit neighbourhood).

|                               |                 | Q10a    | Q10b   | Q10c   | Q10d   | Q10e    | Q10f    | Q10g    | Q10h    | Q11a    | Q11b   | Q11c    | Q11d    | Q11e   | Q11f   | Q11g   | Q12a    | Q12b    | Q12c    | Q12d    |
|-------------------------------|-----------------|---------|--------|--------|--------|---------|---------|---------|---------|---------|--------|---------|---------|--------|--------|--------|---------|---------|---------|---------|
| Q10a Aesthetically Appealing  | Corr. Coef.     |         | .422** | .227** | -0.047 | .193**  | -0.080  | -.177** | -.154*  | -.164*  | -0.091 | -.219** | -0.102  | .148*  | -0.079 | .153*  | .368**  | 0.136   | .252**  | .370**  |
|                               | Sig. (2-tailed) |         | 0.000  | 0.001  | 0.491  | 0.004   | 0.245   | 0.009   | 0.025   | 0.021   | 0.196  | 0.002   | 0.148   | 0.036  | 0.265  | 0.031  | 0.000   | 0.059   | 0.000   | 0.000   |
|                               | N               |         | 215    | 208    | 214    | 215     | 214     | 215     | 210     | 198     | 202    | 198     | 201     | 202    | 201    | 199    | 197     | 194     | 194     | 197     |
| Q10b Distinguishable Ambients | Corr. Coef.     | .422**  |        | .292** | -0.024 | 0.103   | -0.052  | -0.002  | -0.049  | -0.009  | 0.053  | -0.103  | -0.042  | .242** | 0.057  | .198** | .334**  | .336**  | .323**  | .263**  |
|                               | Sig. (2-tailed) | 0.000   |        | 0.000  | 0.731  | 0.132   | 0.451   | 0.979   | 0.482   | 0.897   | 0.448  | 0.148   | 0.553   | 0.000  | 0.417  | 0.005  | 0.000   | 0.000   | 0.000   | 0.000   |
|                               | N               | 215     |        | 208    | 215    | 216     | 215     | 216     | 211     | 200     | 204    | 200     | 203     | 204    | 203    | 201    | 199     | 196     | 196     | 199     |
| Q10c Different Cultures       | Corr. Coef.     | .227**  | .292** |        | 0.054  | 0.129   | -0.058  | -0.112  | 0.032   | -0.102  | -0.073 | -0.033  | -0.004  | .185** | -0.021 | .155*  | .165*   | .208**  | .265**  | .258**  |
|                               | Sig. (2-tailed) | 0.001   | 0.000  |        | 0.441  | 0.062   | 0.405   | 0.106   | 0.646   | 0.158   | 0.309  | 0.652   | 0.953   | 0.009  | 0.769  | 0.030  | 0.022   | 0.004   | 0.000   | 0.000   |
|                               | N               | 208     | 208    |        | 208    | 209     | 208     | 208     | 204     | 192     | 196    | 193     | 195     | 196    | 195    | 195    | 191     | 190     | 190     | 191     |
| Q10d Too Crowded              | Corr. Coef.     | -0.047  | -0.024 | 0.054  |        | -0.020  | 0.103   | .185**  | .357**  | .159*   | 0.102  | 0.047   | 0.093   | -0.047 | 0.017  | 0.090  | -0.028  | 0.122   | -0.050  | -0.036  |
|                               | Sig. (2-tailed) | 0.491   | 0.731  | 0.441  |        | 0.768   | 0.131   | 0.006   | 0.000   | 0.025   | 0.148  | 0.513   | 0.190   | 0.507  | 0.811  | 0.205  | 0.699   | 0.090   | 0.493   | 0.613   |
|                               | N               | 214     | 215    | 208    |        | 215     | 214     | 215     | 209     | 199     | 202    | 198     | 201     | 202    | 201    | 199    | 197     | 194     | 194     | 197     |
| Q10e Clean and Tidy           | Corr. Coef.     | .193**  | 0.103  | 0.129  | -0.020 |         | -.348** | -.355** | -0.076  | -.143*  | -.159* | -.179*  | -.230** | .179*  | -0.123 | 0.070  | .250**  | .153*   | .307**  | .195**  |
|                               | Sig. (2-tailed) | 0.004   | 0.132  | 0.062  | 0.768  |         | 0.000   | 0.000   | 0.275   | 0.044   | 0.024  | 0.011   | 0.001   | 0.011  | 0.081  | 0.324  | 0.000   | 0.033   | 0.000   | 0.006   |
|                               | N               | 215     | 216    | 209    | 215    |         | 215     | 216     | 210     | 199     | 203    | 199     | 202     | 203    | 202    | 200    | 198     | 195     | 195     | 198     |
| Q10f Smelly                   | Corr. Coef.     | -0.080  | -0.052 | -0.058 | 0.103  | -.348** |         | .447**  | .437**  | .256**  | .276** | .338**  | .355**  | -0.115 | .242** | -0.029 | -.178*  | -0.141  | -0.084  | -.159*  |
|                               | Sig. (2-tailed) | 0.245   | 0.451  | 0.405  | 0.131  | 0.000   |         | 0.000   | 0.000   | 0.000   | 0.000  | 0.000   | 0.000   | 0.103  | 0.001  | 0.686  | 0.012   | 0.050   | 0.241   | 0.026   |
|                               | N               | 214     | 215    | 208    | 214    | 215     |         | 215     | 209     | 198     | 202    | 198     | 201     | 202    | 202    | 200    | 198     | 195     | 195     | 198     |
| Q10g Noisy                    | Corr. Coef.     | -.177** | -0.002 | -0.112 | .185** | -.355** | .447**  |         | .341**  | .303**  | .297** | .235**  | .197**  | -0.099 | .280** | 0.022  | -.191** | -0.046  | -0.086  | -.176*  |
|                               | Sig. (2-tailed) | 0.009   | 0.979  | 0.106  | 0.006  | 0.000   | 0.000   |         | 0.000   | 0.000   | 0.000  | 0.001   | 0.005   | 0.158  | 0.000  | 0.753  | 0.007   | 0.519   | 0.234   | 0.013   |
|                               | N               | 215     | 216    | 208    | 215    | 216     | 215     |         | 210     | 199     | 203    | 199     | 202     | 203    | 202    | 200    | 198     | 195     | 195     | 198     |
| Q10h Sensory Overwhelmed      | Corr. Coef.     | -.154*  | -0.049 | 0.032  | .357** | -0.076  | .437**  | .341**  |         | .271**  | .299** | .282**  | .252**  | -0.131 | .283** | 0.112  | -0.108  | -0.089  | -.202** | -.260** |
|                               | Sig. (2-tailed) | 0.025   | 0.482  | 0.646  | 0.000  | 0.275   | 0.000   | 0.000   |         | 0.000   | 0.000  | 0.000   | 0.000   | 0.065  | 0.000  | 0.116  | 0.134   | 0.220   | 0.005   | 0.000   |
|                               | N               | 210     | 211    | 204    | 209    | 210     | 209     | 210     |         | 195     | 199    | 196     | 198     | 199    | 198    | 197    | 195     | 193     | 193     | 195     |
| Q11a Too Many Obstacles       | Corr. Coef.     | -.164*  | -0.009 | -0.102 | .159*  | -.143*  | .256**  | .303**  | .271**  |         | .595** | .379**  | .367**  | 0.101  | .295** | 0.051  | -.160*  | -0.032  | -.184*  | -.235** |
|                               | Sig. (2-tailed) | 0.021   | 0.897  | 0.158  | 0.025  | 0.044   | 0.000   | 0.000   | 0.000   |         | 0.000  | 0.000   | 0.000   | 0.151  | 0.000  | 0.473  | 0.024   | 0.654   | 0.010   | 0.001   |
|                               | N               | 198     | 200    | 192    | 199    | 199     | 198     | 199     | 195     |         | 203    | 198     | 201     | 202    | 201    | 199    | 197     | 194     | 194     | 197     |
| Q11b Slippery Floors          | Corr. Coef.     | -0.091  | 0.053  | -0.073 | 0.102  | -.159*  | .276**  | .297**  | .299**  | .595**  |        | .353**  | .340**  | 0.068  | .348** | 0.091  | -.181*  | -0.039  | -0.110  | -0.120  |
|                               | Sig. (2-tailed) | 0.196   | 0.448  | 0.309  | 0.148  | 0.024   | 0.000   | 0.000   | 0.000   | 0.000   |        | 0.000   | 0.000   | 0.333  | 0.000  | 0.199  | 0.010   | 0.591   | 0.123   | 0.091   |
|                               | N               | 202     | 204    | 196    | 202    | 203     | 202     | 203     | 199     | 203     |        | 202     | 205     | 206    | 205    | 203    | 199     | 197     | 197     | 200     |
| Q11c Hesitate to Go Out       | Corr. Coef.     | -.219** | -0.103 | -0.033 | 0.047  | -.179*  | .338**  | .235**  | .282**  | .379**  | .353** |         | .505**  | -0.092 | .149*  | 0.060  | -.189** | -.182*  | 0.059   | -0.137  |
|                               | Sig. (2-tailed) | 0.002   | 0.148  | 0.652  | 0.513  | 0.011   | 0.000   | 0.001   | 0.000   | 0.000   | 0.000  |         | 0.000   | 0.195  | 0.034  | 0.399  | 0.008   | 0.011   | 0.416   | 0.056   |
|                               | N               | 198     | 200    | 193    | 198    | 199     | 198     | 199     | 196     | 198     | 202    |         | 202     | 202    | 201    | 200    | 195     | 193     | 193     | 195     |
| Q11d Cannot Find My Way       | Corr. Coef.     | -0.102  | -0.042 | -0.004 | 0.093  | -.230** | .355**  | .197**  | .252**  | .367**  | .340** | .505**  |         | -0.118 | .149*  | -0.096 | -.261** | -.228** | -0.094  | -.208** |
|                               | Sig. (2-tailed) | 0.148   | 0.553  | 0.953  | 0.190  | 0.001   | 0.000   | 0.005   | 0.000   | 0.000   | 0.000  | 0.000   |         | 0.090  | 0.033  | 0.171  | 0.000   | 0.001   | 0.188   | 0.003   |
|                               | N               | 201     | 203    | 195    | 201    | 202     | 201     | 202     | 198     | 201     | 205    | 202     |         | 206    | 205    | 203    | 199     | 196     | 196     | 199     |
| Q11e Nature                   | Corr. Coef.     | .148*   | .242** | .185** | -0.047 | .179*   | -0.115  | -0.099  | -0.131  | 0.101   | 0.068  | -0.092  | -0.118  |        | 0.110  | .319** | .302**  | .304**  | .247**  | .331**  |
|                               | Sig. (2-tailed) | 0.036   | 0.000  | 0.009  | 0.507  | 0.011   | 0.103   | 0.158   | 0.065   | 0.151   | 0.333  | 0.195   | 0.090   |        | 0.115  | 0.000  | 0.000   | 0.000   | 0.000   | 0.000   |
|                               | N               | 202     | 204    | 196    | 202    | 203     | 202     | 203     | 199     | 202     | 206    | 202     | 206     |        | 206    | 204    | 200     | 197     | 197     | 200     |
| Q11f Messy and Dark Places    | Corr. Coef.     | -0.079  | 0.057  | -0.021 | 0.017  | -0.123  | .242**  | .280**  | .283**  | .295**  | .348** | .149*   | .149*   | 0.110  |        | .316** | -0.050  | 0.062   | -0.123  | -0.058  |
|                               | Sig. (2-tailed) | 0.265   | 0.417  | 0.769  | 0.811  | 0.081   | 0.001   | 0.000   | 0.000   | 0.000   | 0.000  | 0.034   | 0.033   | 0.115  |        | 0.000  | 0.484   | 0.388   | 0.085   | 0.416   |
|                               | N               | 201     | 203    | 195    | 201    | 202     | 202     | 202     | 198     | 201     | 205    | 201     | 205     | 206    |        | 204    | 200     | 197     | 197     | 200     |
| Q11g Sheltered Pathways       | Corr. Coef.     | .153*   | .198** | .155*  | 0.090  | 0.070   | -0.029  | 0.022   | 0.112   | 0.051   | 0.091  | 0.060   | -0.096  | .319** | .316** |        | .241**  | .300**  | .232**  | .186**  |
|                               | Sig. (2-tailed) | 0.031   | 0.005  | 0.030  | 0.205  | 0.324   | 0.686   | 0.753   | 0.116   | 0.473   | 0.199  | 0.399   | 0.171   | 0.000  | 0.000  |        | 0.001   | 0.000   | 0.001   | 0.009   |
|                               | N               | 199     | 201    | 195    | 199    | 200     | 200     | 200     | 197     | 199     | 203    | 200     | 203     | 204    | 204    |        | 198     | 197     | 197     | 198     |
| Q12a Amenities                | Corr. Coef.     | .368**  | .334** | .165*  | -0.028 | .250**  | -.178*  | -.191** | -0.108  | -.160*  | -.181* | -.189** | -.261** | .302** | -0.050 | .241** |         | .483**  | .438**  | .498**  |
|                               | Sig. (2-tailed) | 0.000   | 0.000  | 0.022  | 0.699  | 0.000   | 0.012   | 0.007   | 0.134   | 0.024   | 0.010  | 0.008   | 0.000   | 0.000  | 0.484  | 0.001  |         | 0.000   | 0.000   | 0.000   |
|                               | N               | 197     | 199    | 191    | 197    | 198     | 198     | 198     | 195     | 197     | 199    | 195     | 199     | 200    | 200    | 198    |         | 199     | 199     | 202     |
| Q12b Different Generations    | Corr. Coef.     | 0.136   | .336** | .208** | 0.122  | .153*   | -0.141  | -0.046  | -0.089  | -0.032  | -0.039 | -.182*  | -.228** | .304** | 0.062  | .300** | .483**  |         | .386**  | .345**  |
|                               | Sig. (2-tailed) | 0.059   | 0.000  | 0.004  | 0.090  | 0.033   | 0.050   | 0.519   | 0.220   | 0.654   | 0.591  | 0.011   | 0.001   | 0.000  | 0.388  | 0.000  | 0.000   |         | 0.000   | 0.000   |
|                               | N               | 194     | 196    | 190    | 194    | 195     | 195     | 195     | 193     | 194     | 197    | 193     | 196     | 197    | 197    | 197    | 199     |         | 199     | 200     |
| Q12c Elderly-friendly Design  | Corr. Coef.     | .252**  | .323** | .265** | -0.050 | .307**  | -0.084  | -0.086  | -.202** | -.184*  | -0.110 | 0.059   | -0.094  | .247** | -0.123 | .232** | .438**  | .386**  |         | .427**  |
|                               | Sig. (2-tailed) | 0.000   | 0.000  | 0.000  | 0.493  | 0.000   | 0.241   | 0.234   | 0.005   | 0.010   | 0.123  | 0.416   | 0.188   | 0.000  | 0.085  | 0.001  | 0.000   | 0.000   |         | 0.000   |
|                               | N               | 194     | 196    | 190    | 194    | 195     | 195     | 195     | 193     | 194     | 197    | 193     | 196     | 197    | 197    | 197    | 199     | 199     |         | 200     |
| Q12d Happy                    | Corr. Coef.     | .370**  | .263** | .258** | -0.036 | .195**  | -.159*  | -.176*  | -.260** | -.235** | -0.120 | -0.137  | -.208** | .331** | -0.058 | .186** | .498**  | .345**  | .427**  |         |
|                               | Sig. (2-tailed) | 0.000   | 0.000  | 0.000  | 0.613  | 0.006   | 0.026   | 0.013   | 0.000   | 0.001   | 0.091  | 0.056   | 0.003   | 0.000  | 0.416  | 0.009  | 0.000   | 0.000   | 0.000   |         |
|                               | N               | 197     | 199    | 191    | 197    | 198     | 198     | 198     | 195     | 197     | 200    | 195     | 199     | 200    | 200    | 198    | 202     | 200     | 200     |         |

\*\*, Correlation is significant at the 0.01 level (2-tailed).

\*, Correlation is significant at the 0.05 level (2-tailed).

|                         |                    |                        |                      |                           |
|-------------------------|--------------------|------------------------|----------------------|---------------------------|
| Very Weak (r=0.00-0.19) | Weak (r=0.20-0.39) | Moderate (r=0.40-0.59) | Strong (r=0.60-0.79) | Very Strong (r=0.80-1.00) |
|-------------------------|--------------------|------------------------|----------------------|---------------------------|
