# Supplementary material for: A Study of Older Adults’ Perception of High-Density Housing Neighbourhoods in Singapore: Multi-Sensory Perspective
Source: Int J Environ Res Public Health. 2021 Jun 26;18(13):6880. doi: 10.3390/ijerph18136880 (PMC8297031; doi:10.3390/ijerph18136880)

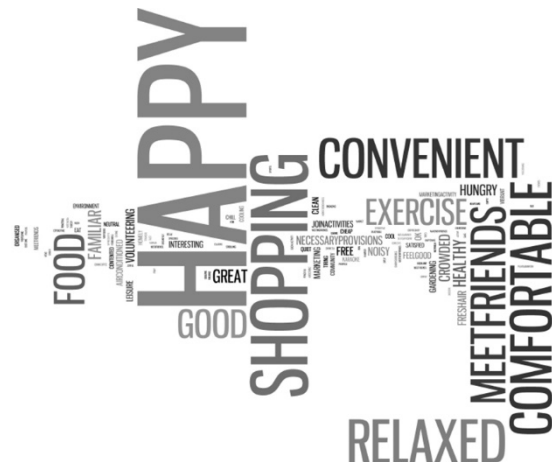

Figure S1. Keywords describing the most frequently visited spaces in Bangkit neighbourhood.

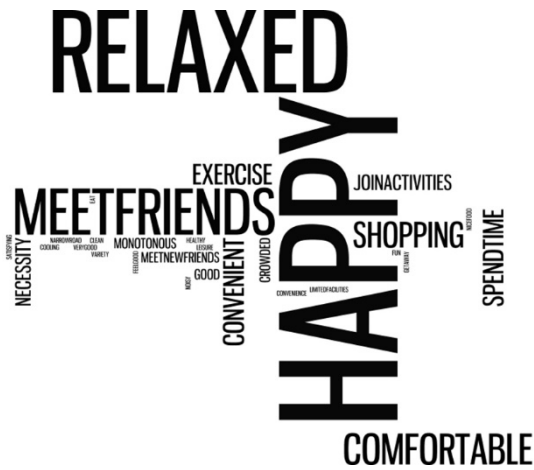

Figure S2. Keywords describing the most frequently visited spaces in Clementi neighbourhood.

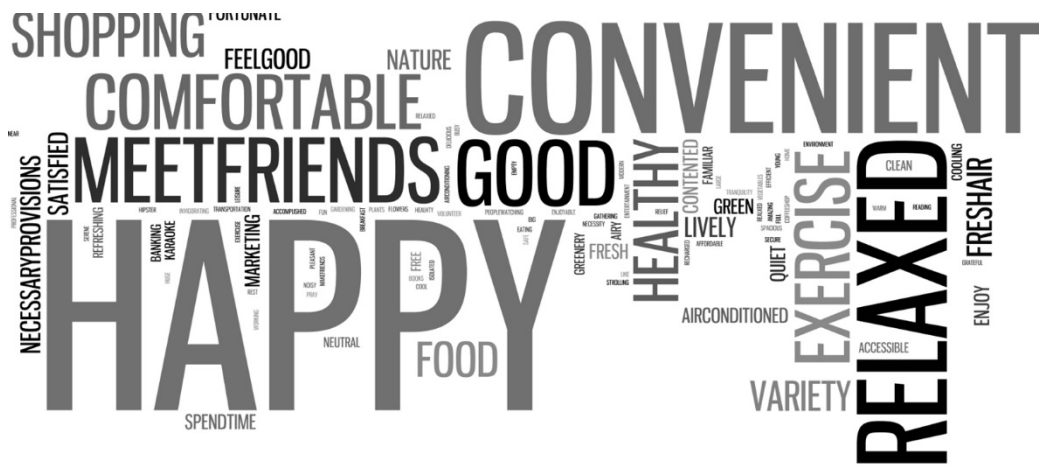

Figure S3. Keywords describing the most liked places in Bangkit neighbourhood.

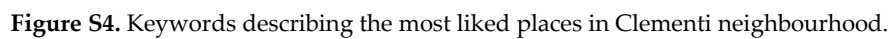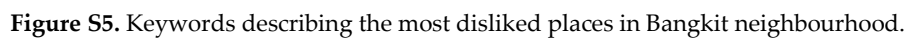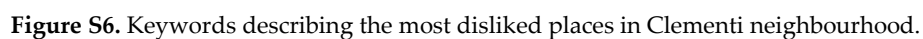

Supplement: Supplementary file 1 [file ijerph-18-06880-s001.zip › Figures_S1-S6.pdf]
