# Supplementary figures and images for: A Study of Older Adults’ Perception of High-Density Housing Neighbourhoods in Singapore: Multi-Sensory Perspective
Source: MDPI journal article supplement (doi:10.3390/ijerph18136880), 2021-06-26

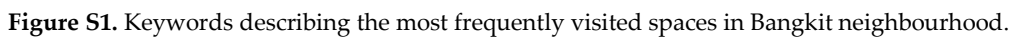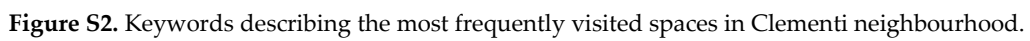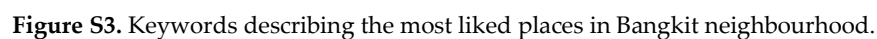

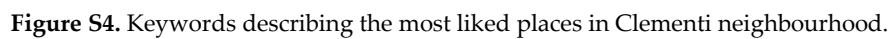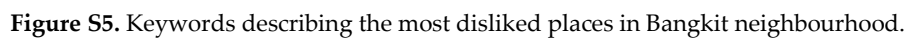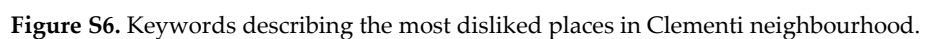

Supplement: s1 [file s1]
